# Supplementary material for: A Rapidly Stabilizing Water-Gated Field-Effect Transistor Based on Printed Single-Walled Carbon Nanotubes for Biosensing Applications
Source: PubMed Central journal article supplement (PMC8411763; doi:10.1021/acsaelm.1c00332), 2021-07-01
Supplement: el1c00332_si_001.pdf [file el1c00332_si_001.pdf]

## Supporting Information

# A Rapidly Stabilizing Water-Gated Field-Effect Transistor Based on Printed Single-Walled Carbon Nanotubes for Biosensing Applications

*Alireza Molazemhosseini,<sup>†</sup> Fabrizio Antonio Viola,<sup>†</sup> Felix J. Berger,<sup>‡</sup> Nicolas F. Zorn,<sup>‡</sup> Jana Zaumseil,<sup>‡</sup> Mario Caironi<sup>†,\*</sup>*

<sup>†</sup>Center for Nano Science and Technology @PoliMi, Istituto Italiano di Tecnologia, Via Giovanni Pascoli, 70/3, 20133 Milano, Italy

<sup>‡</sup>Institute for Physical Chemistry and Centre for Advanced Materials, Universität Heidelberg, D-69120 Heidelberg, Germany

\*Corresponding Author, Email: [mario.caironi@iit.it](mailto:mario.caironi@iit.it)

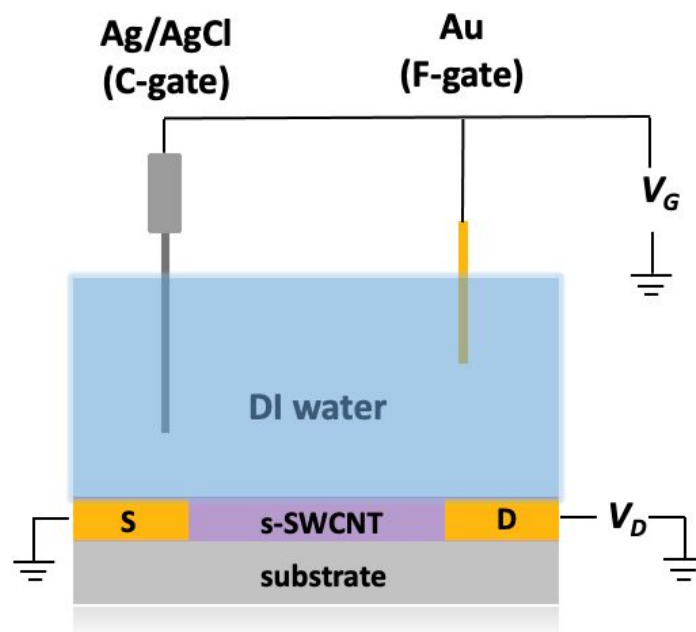

**Figure S1.** Schematic representation of the biosensor: it consists of an EG-CNTFET, a reference electrode (C-gate) made of Ag/AgCl to monitor the stability of the channel, and a gold gate (F-gate) for functionalization.

### **Fabrication of inkjet-printed P3HT based EGOFET**

Poly(3-hexylthiophene) (P3HT; Sigma Aldrich, regio-regularity 99%, average MW = 20000 – 45000 g.mol<sup>-1</sup>) was dissolved in 1,2-dichlorobenzene (ODCB) at a concentration of 2.6 mg.mL<sup>-1</sup> and then inkjet-printed by means of a Fujifilm Dimatix onto the active area of interdigitated source-drain electrodes with channel width ( $W$ ) of 4.4 mm and length ( $L$ ) of 3  $\mu$ m patterned on glass (the same electrodes used for EG-CNTFET). The ink was printed at a drop spacing of 45 mm. The device was annealed at 130 °C for 8 hours in an inert atmosphere.

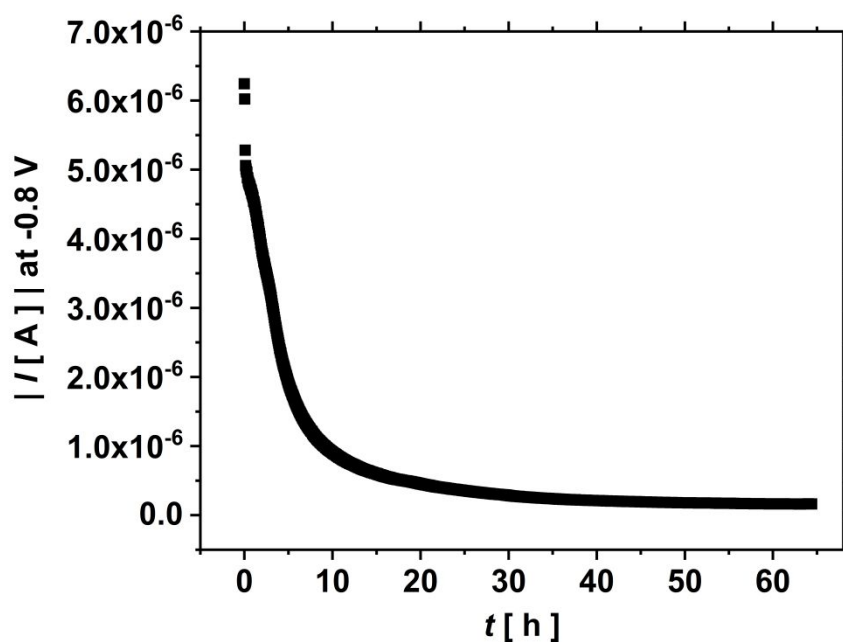

**Figure S2.** Current values extracted at -0.8 V from consecutive transfer curves acquired with 3 min interval for inkjet-printed P3HT based EGOFET.

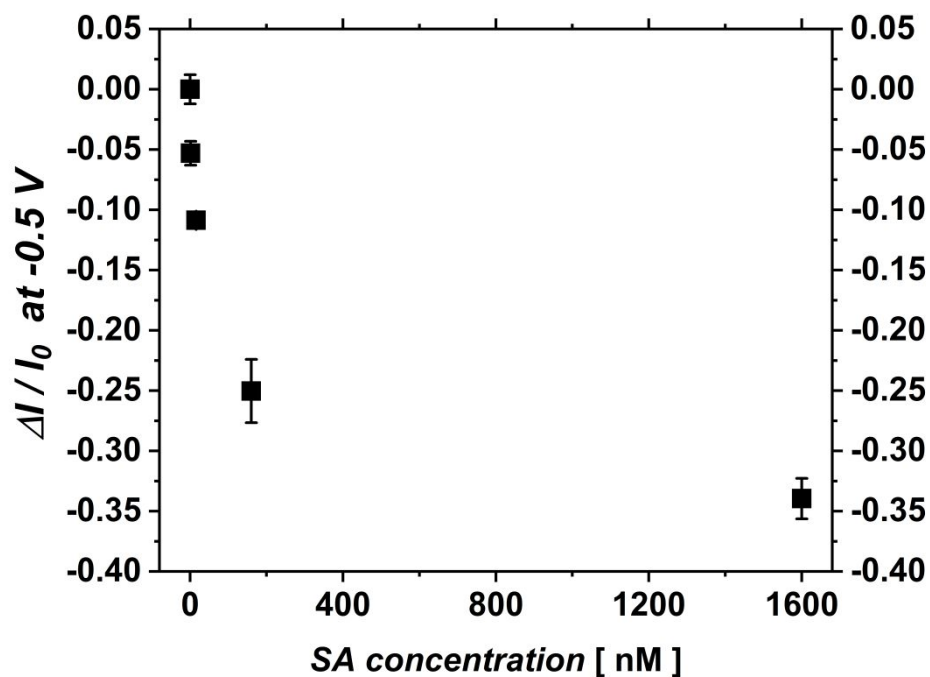

**Figure S3.** calibration curve based on normalized current change at -0.5 V extracted from transfer curves presented in Figure 3b.

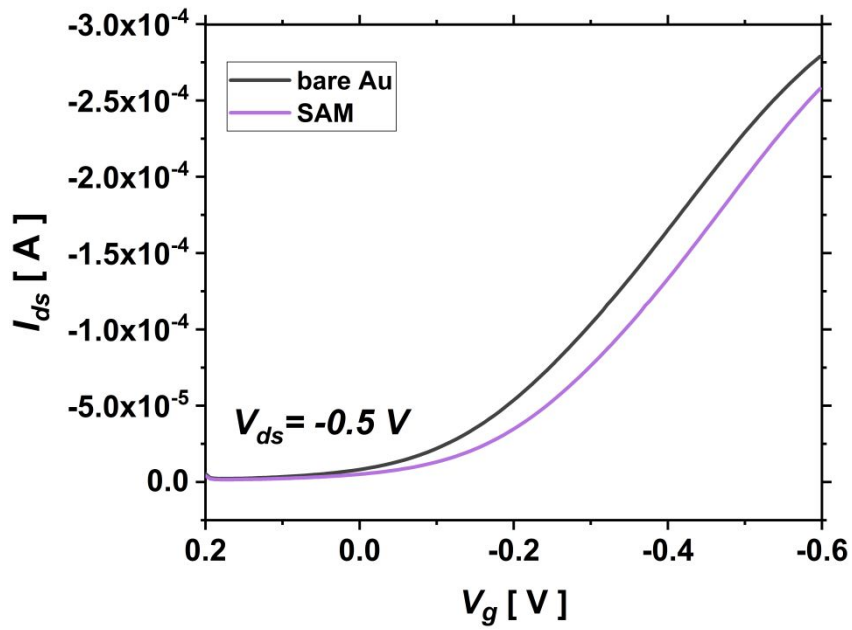

**Figure S4.** Typical transfer characteristic curves for a bare gold gate as well as Cys-SAM functionalized gold gate.

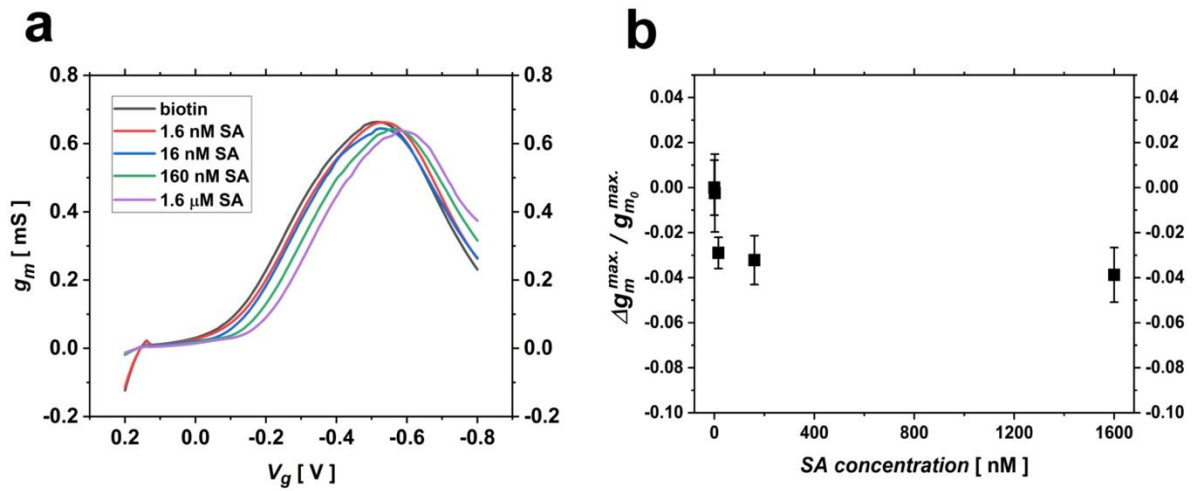

**Figure S5.** (a) transconductance curves for different concentrations of streptavidin extracted from transfer curves presented in Figure 3b; F-gate not exposed to streptavidin is denoted as “biotin”. (b) titration curve for normalized maximum transconductance extracted from curves in (a).

Sample #1  
WCA=12.8°

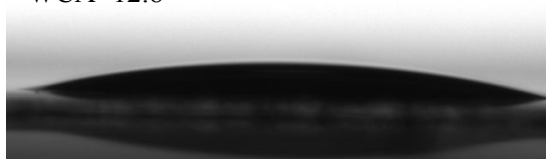

Sample #2  
WCA=12.6°

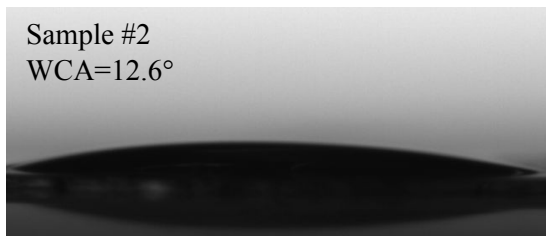

Sample #3  
WCA=12.9°

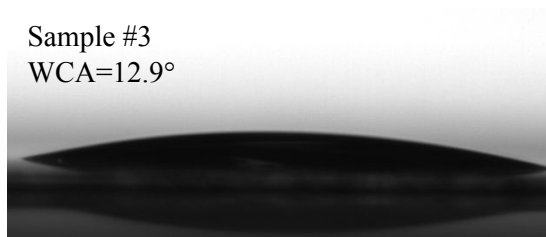

**Figure S6.** Water contact angle measurements on three physically different biotin functionalized F-gates in order to confirm the reproducibility of the functionalization procedure. The droplet volume is 10  $\mu\text{L}$ .
